# Supplementary material for: Identifying endoplasmic reticulum stress-related genes as new diagnostic and prognostic biomarkers in clear cell renal cell carcinoma
Source: PubMed Central journal article supplement — Transl Androl Urol. 2024 Jan 23;13(1):1–24. doi: 10.21037/tau-23-374 (PMC10891384; doi:10.21037/tau-23-374), 2024-01-23
Supplement: tau-13-01-1-supplementary.pdf [file tau-13-01-1-supplementary.pdf]

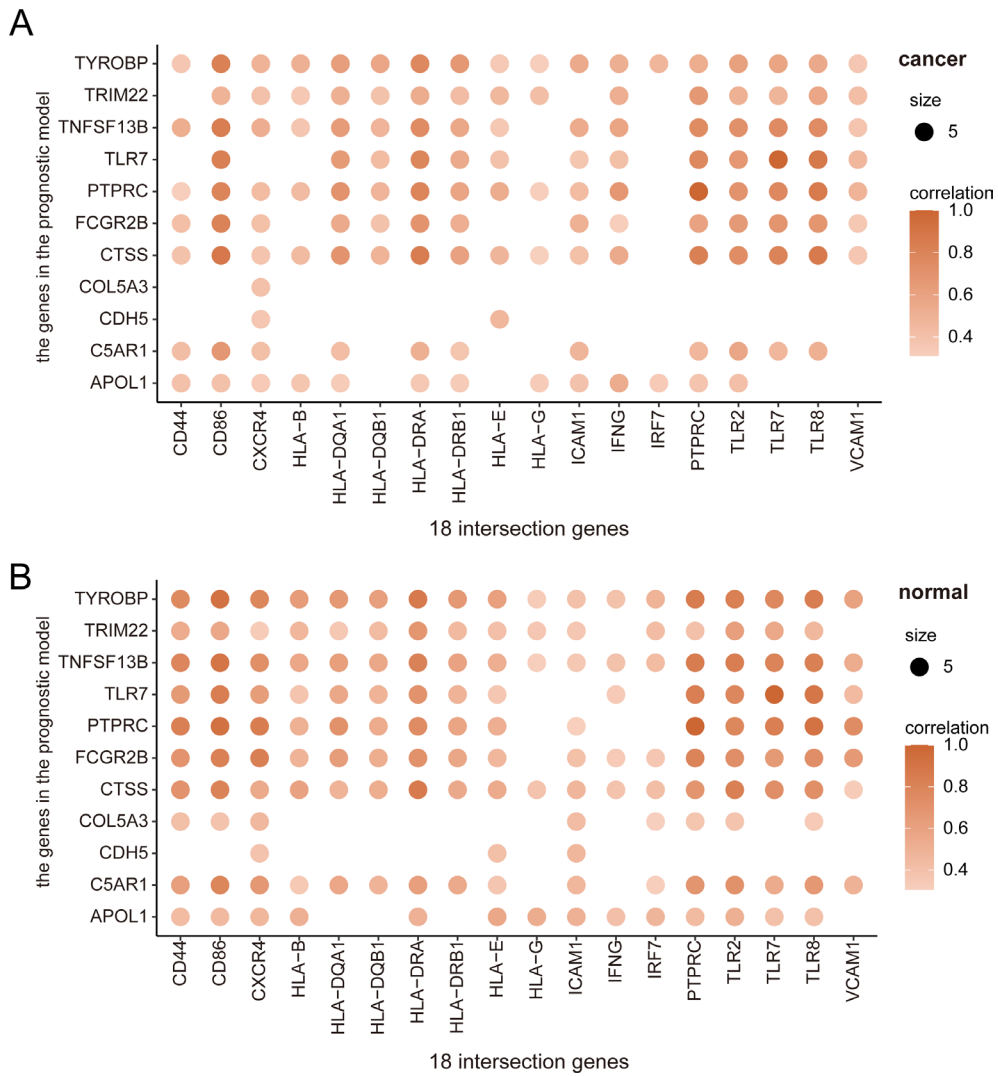

**Figure S1** Correlations between the 11 signature genes and the 18 intersection genes in the ccRCC tissues and normal tissues from TCGA.
